# Supplementary material
Source: publisher site journal article supplement (https://www.dovepress.com/article/594709)
Supplement: Supplementary file 1 [file 594709%20Supplementary%20File.docx]

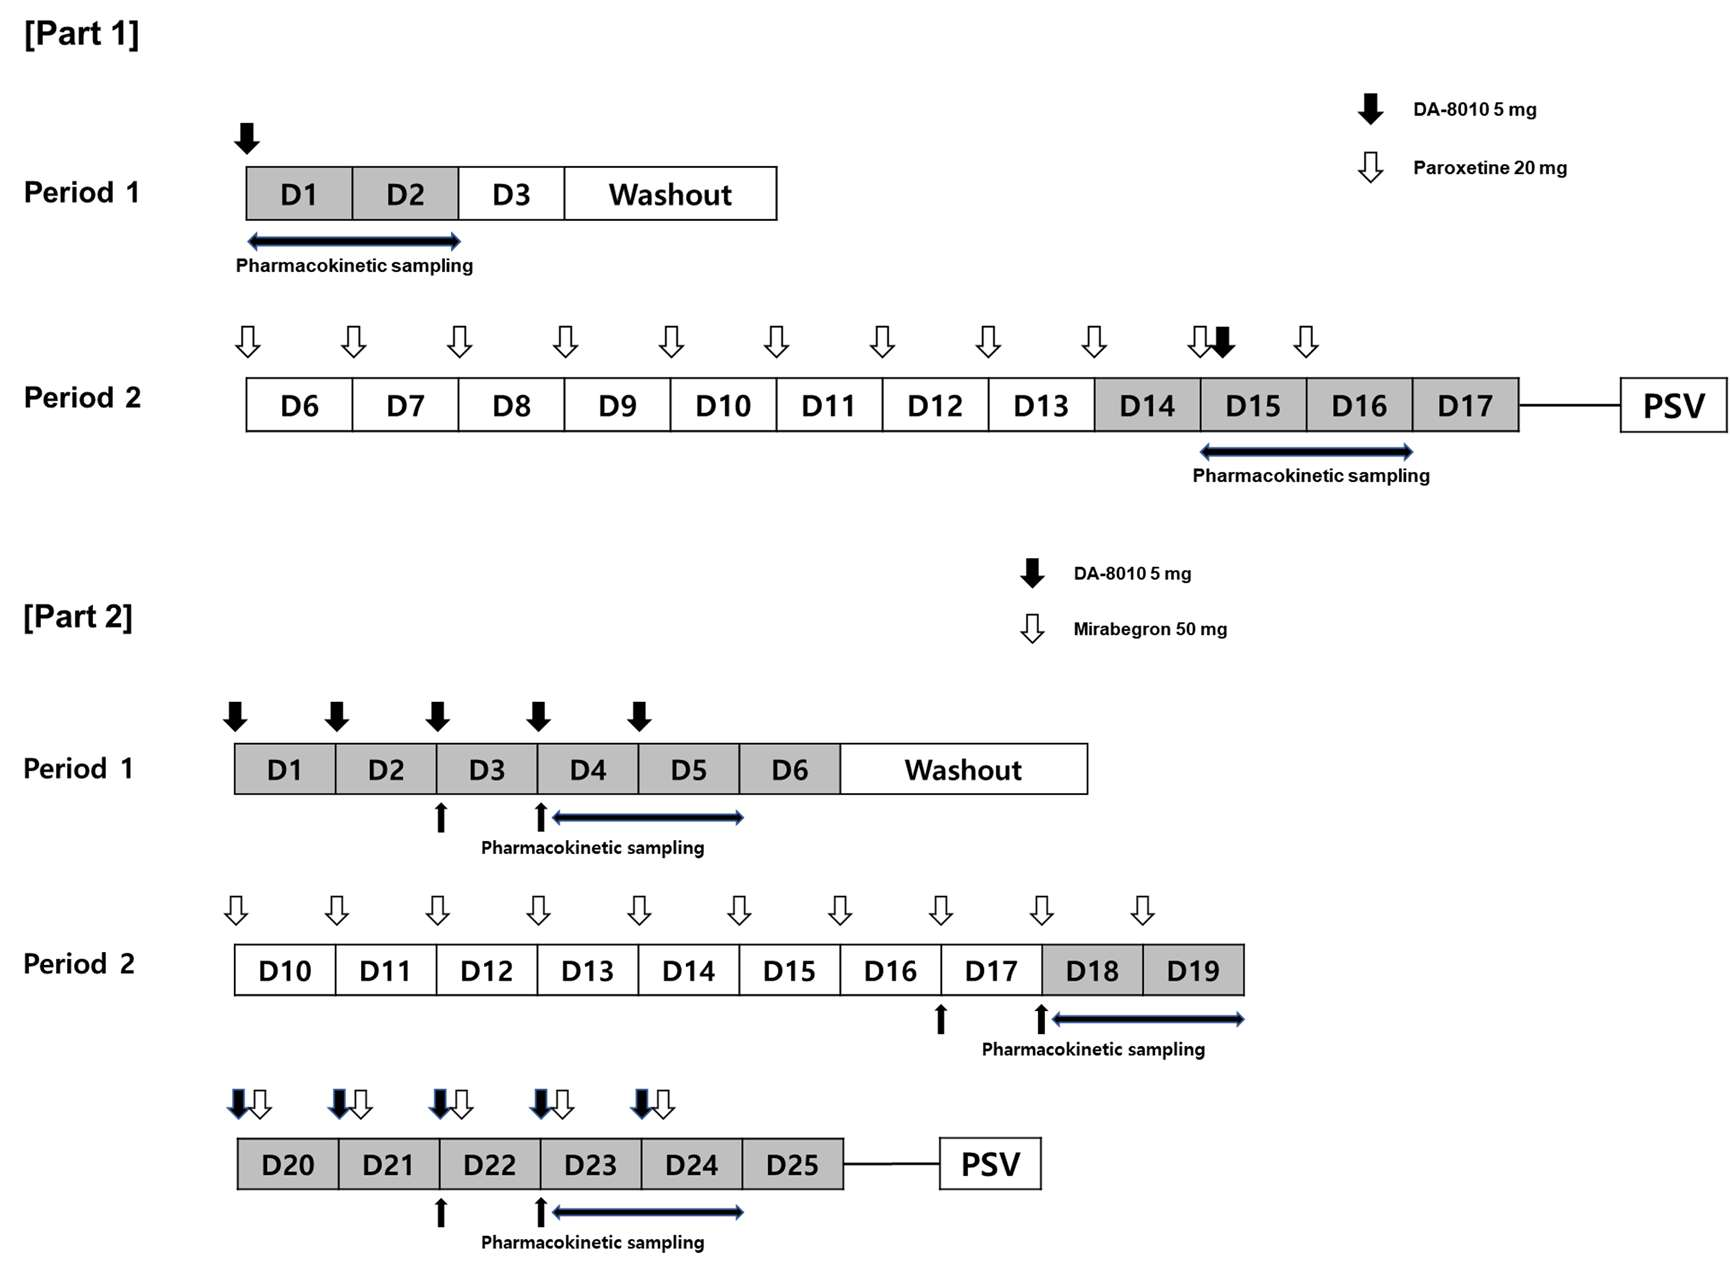


**Figure S1. Study design**

Table S1. Incidence of Treatment-Emergent Adverse Events (TEAEs) of Part 1 by System Organ Class and Preferred Terms

| System Organ Class  Preferred Term | DA-8010 5 mg (N=18) | Paroxetine 20 mg  QD for 11 days  +   DA-8010 5 mg (N=18) |
| --- | --- | --- |
| **Subjects with at least one TEAEs** | **3 (16.7) [6]** | **10 (55.6) [35]** |
| **Eye disorders** | **.** | **1 (5.6) [1]** |
| Visual Disturbance | . | 1 (5.6) [1] |
| **Gastrointestinal disorders** | **2 (11.1) [4]** | **4 (22.2) [10]** |
| Abdominal Pain | 1 (5.6) [1] | . |
| Diarrhea | 1 (5.6) [1] | . |
| Dry Mouth | 1 (5.6) [1] | 1 (5.6) [2] |
| Dyspepsia | . | 3 (16.7) [3] |
| Loose Stool | . | 2 (11.1) [2] |
| Lower Abdominal Tenderness | . | 1 (5.6) [1] |
| Nausea | 1 (5.6) [1] | 2 (11.1) [2] |
| **General disorders and administration site conditions** | **.** | **4 (22.2) [4]** |
| Fatigue | . | 4 (22.2) [4] |
| **Investigations** | **2 (11.1) [2]** | **3 (16.7) [3]** |
| Absolute Neutrophil Count Decreased | . | 1 (5.6) [1] |
| Absolute Neutrophil Count Increased | 1 (5.6) [1] | . |
| Blood Phosphorus Increased | . | 2 (11.1) [2] |
| Blood Triglycerides Increased | 1 (5.6) [1] | . |
| **Metabolism and nutrition disorders** | **.** | **2 (11.1) [2]** |
| Appetite Lost | . | 2 (11.1) [2] |
| **Musculoskeletal and connective tissue disorders** | **.** | **2 (11.1) [2]** |
| Myalgia | . | 2 (11.1) [2] |
| **Nervous system disorders** | **.** | **6 (33.3) [7]** |
| Dizziness | . | 1 (5.6) [1] |
| Drowsiness | . | 2 (11.1) [2] |
| Headache | . | 3 (16.7) [3] |
| Taste Sour | . | 1 (5.6) [1] |
| **Psychiatric disorders** | **.** | **1 (5.6) [1]** |
| Visual Illusion | . | 1 (5.6) [1] |
| **Renal and urinary disorders** | **.** | **1 (5.6) [2]** |
| Urinary Frequency | . | 1 (5.6) [1] |
| Urinary Retention | . | 1 (5.6) [1] |
| **Respiratory, thoracic and mediastinal disorders** | **.** | **1 (5.6) [2]** |
| Nasal Itching | . | 1 (5.6) [1] |
| Rhinorrhea | . | 1 (5.6) [1] |
| **Skin and subcutaneous tissue disorders** | **.** | **1 (5.6) [1]** |
| Cold Sweat | . | 1 (5.6) [1] |

Medical Coding Dictionary: MedDRA® (version 26.1)
Data are displayed as number of subjects (percentage of subjects) [number of events]
Percentages are based on the subjects within each part

Table S2. Incidence of Treatment-Emergent Adverse Events (TEAEs) by System Organ Class and Preferred Terms

| System Organ Class  Preferred Term | DA-8010 5 mg  QD for 5 days (N=18) | Mirabegron 50 mg  QD for 10 days (N=17) | Mirabegron 50 mg  QD for 5 days  +  DA-8010 5 mg  QD for 5 days (N=17) |
| --- | --- | --- | --- |
| **Subjects with at least one TEAEs** | **7 (38.9) [11]** | **5 (27.8) [6]** | **2 (11.1) [6]** |
| **Cardiac disorders** | **1 (5.6) [1]** | **1 (5.6) [1]** | **.** |
| Palpitation | 1 (5.6) [1] | 1 (5.6) [1] | . |
| **Eye disorders** | **2 (11.1) [2]** | **.** | **.** |
| Bloodshot Eye | 1 (5.6) [1] | . | . |
| Dry Eyes | 1 (5.6) [1] | . | . |
| **Gastrointestinal disorders** | **2 (11.1) [2]** | **1 (5.6) [1]** | **.** |
| Diarrhea | 1 (5.6) [1] | . | . |
| Dyspepsia | 1 (5.6) [1] | 1 (5.6) [1] | . |
| **General disorders and administration site conditions** | **1 (5.6) [1]** | **1 (5.6) [1]** | **.** |
| Chest Pain | 1 (5.6) [1] | . | . |
| Feeling Hot | . | 1 (5.6) [1] | . |
| **Investigations** | **3 (16.7) [5]** | **2 (11.1) [2]** | **.** |
| Absolute Neutrophil Count Decreased | . | 1 (5.6) [1] | . |
| Blood Pressure Diastolic Increased | . | 1 (5.6) [1] | . |
| Blood Pressure Systolic Increased | 1 (5.6) [1] | . | . |
| CPK Increased | 1 (5.6) [1] | . | . |
| Electrocardiogram QT Shortened | 1 (5.6) [1] | . | . |
| Heart Rate Increased | 1 (5.6) [1] | . | . |
| Pulse Rate Increased | 1 (5.6) [1] | . | . |
| **Musculoskeletal and connective tissue disorders** | **.** | **.** | **1 (5.6) [1]** |
| Wrist Pain | . | . | 1 (5.6) [1] |
| **Nervous system disorders** | **.** | **1 (5.6) [1]** | **.** |
| Drowsiness | . | 1 (5.6) [1] | . |
| **Respiratory, thoracic and mediastinal disorders** | **.** | **.** | **2 (11.1) [4]** |
| Cough | . | . | 1 (5.6) [1] |
| Rhinorrhea | . | . | 2 (11.1) [2] |
| Sore Throat | . | . | 1 (5.6) [1] |
| **Skin and subcutaneous tissue disorders** | **.** | **.** | **1 (5.6) [1]** |
| Dry Skin | . | . | 1 (5.6) [1] |

Medical Coding Dictionary: MedDRA® (version 26.1)
Data are displayed as number of subjects (percentage of subjects) [number of events]
Percentages are based on the subjects within each part
